# Supplementary material for: Vapor detection and vapor pressure measurements of fentanyl and fentanyl hydrochloride salt at ambient temperatures
Source: Royal Society of Chemistry journal article supplement (doi:10.1039/d2an01149b), 2022-01-01
Supplement: d2an01149b1.pdf [file d2an01149b1.pdf]

## Vapor detection and vapor pressure measurements of fentanyl and fentanyl hydrochloride salt at ambient temperatures

Robert G. Ewing<sup>1,\*</sup> Megan K. Nims<sup>1</sup>, Kelsey A. Morrison<sup>1</sup>, Garret L. Hart<sup>1</sup>, Nancy M. Avalos<sup>1</sup>, Elizabeth H. Denis<sup>1,\*</sup>

<sup>1</sup>Pacific Northwest National Laboratory, 902 Battelle Boulevard, P.O. Box 999, MSIN P7-50, Richland, WA 99352 USA

\*Co-Corresponding Authors: Robert G. Ewing, phone: 509-375-6453, [robert.ewing@pnnl.gov](mailto:robert.ewing@pnnl.gov)  
Elizabeth H. Denis, phone: 509-372-4874, [elizabeth.denis@pnnl.gov](mailto:elizabeth.denis@pnnl.gov)

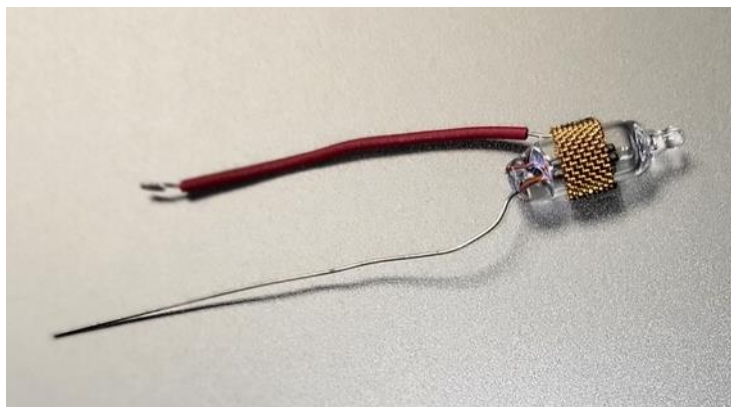

**Figure S1.** Photograph of dielectric barrier discharge ionization source. The inner and outer leads were connected to a radiofrequency power supply, which produced a ~42 kHz waveform with a ~2.5 kV peak-to-peak voltage.

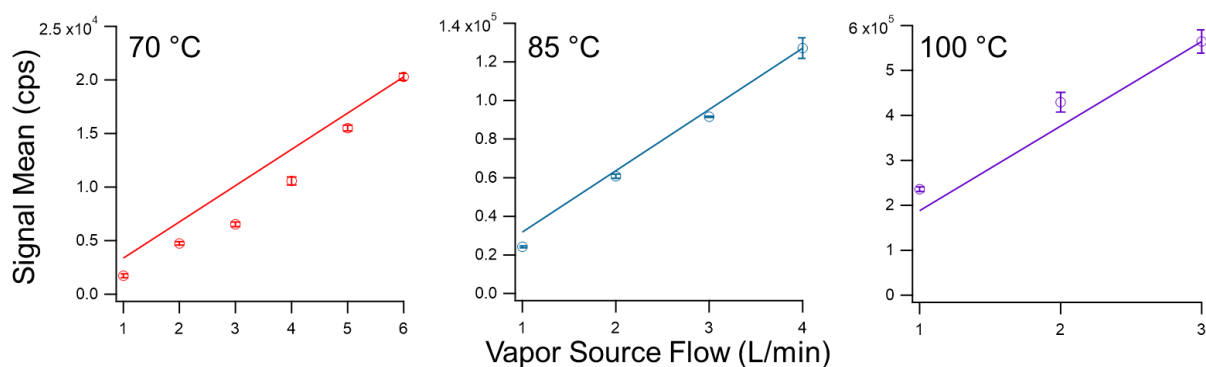

**Figure S2.** Direct vapor measurements of the fentanyl-HCl saturated vapor source at 70 °C, 85 °C, and 100 °C. The solid line in each plot indicates where points should fall based on ideal proportional scaling between signal intensity and flow rate. The circles represent average peak height at a given flow.

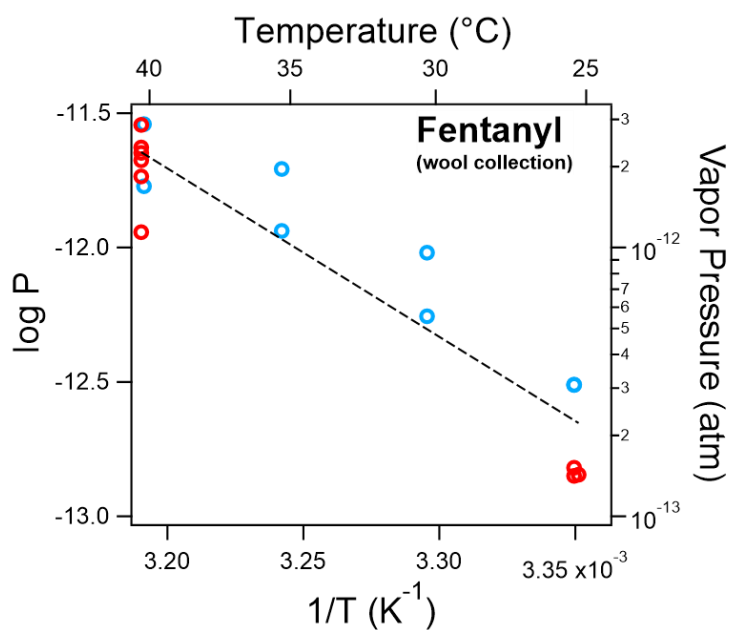

**Figure S3.** Clausius-Clapeyron relations of log P as a function of temperature for fentanyl using the wool collection and extraction method. Circle colors indicate data collected on different days.

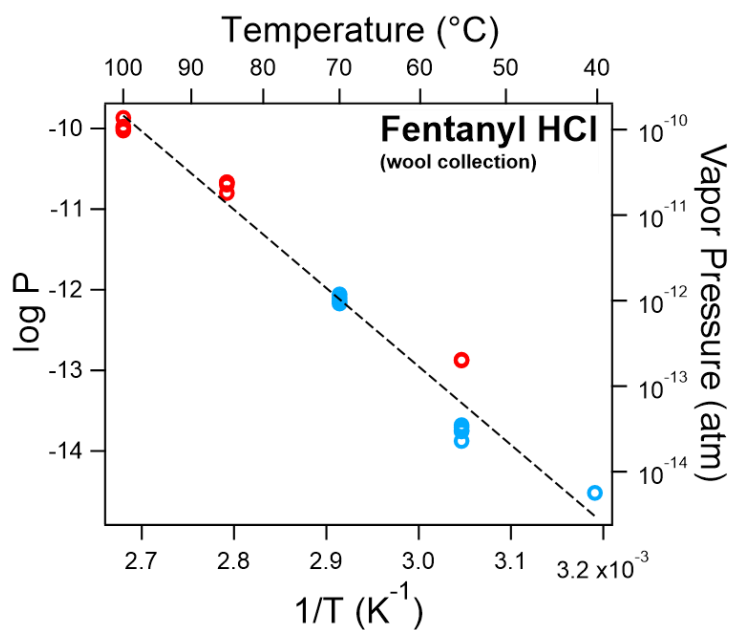

**Figure S4.** Clausius-Clapeyron relations of log P as a function of temperature for fentanyl hydrochloride salt using the wool collection and extraction method. Circle colors indicate data collected on different days.

**Table S1.** Individual measurements of fentanyl free base vapor pressures, log (P/atm), obtained from the filter collection experiments on two different days.

| Day | Temperature (°C) | Temperature (K) | Fentanyl Log (P/atm) |
|-----|------------------|-----------------|----------------------|
| 1   | 14.6             | 287.75          | -13.83               |
| 1   | 14.6             | 287.75          | -13.70               |
| 1   | 14.8             | 287.95          | -13.84               |
| 1   | 19.5             | 292.65          | -13.44               |
| 1   | 19.9             | 293.05          | -13.43               |
| 1   | 20.0             | 293.15          | -13.45               |
| 1   | 20.1             | 293.25          | -13.47               |
| 1   | 20.1             | 293.25          | -13.19               |
| 1   | 25.4             | 298.55          | -13.19               |
| 1   | 25.4             | 298.55          | -13.10               |
| 1   | 25.4             | 298.55          | -13.00               |
| 1   | 25.4             | 298.55          | -13.06               |
| 1   | 30.4             | 303.55          | -12.77               |
| 1   | 30.4             | 303.55          | -12.72               |
| 1   | 30.4             | 303.55          | -12.69               |
| 1   | 35.3             | 308.45          | -12.35               |
| 1   | 35.3             | 308.45          | -12.35               |
| 1   | 35.3             | 308.45          | -12.32               |
| 1   | 40.3             | 313.45          | -11.98               |
| 1   | 40.3             | 313.45          | -11.87               |
| 1   | 40.3             | 313.45          | -11.89               |
| 2   | 12.6             | 285.70          | -14.17               |
| 2   | 12.6             | 285.75          | -14.22               |
| 2   | 12.7             | 285.80          | -14.32               |
| 2   | 15.1             | 288.20          | -13.95               |
| 2   | 15.0             | 288.15          | -13.99               |
| 2   | 15.0             | 288.15          | -13.93               |
| 2   | 18.9             | 292.00          | -13.59               |
| 2   | 18.7             | 291.85          | -13.53               |
| 2   | 18.7             | 291.80          | -13.47               |
| 2   | 19.6             | 292.75          | -13.46               |
| 2   | 19.7             | 292.80          | -13.53               |
| 2   | 19.7             | 292.80          | -13.48               |
| 2   | 25.6             | 298.70          | -12.96               |
| 2   | 25.4             | 298.55          | -12.98               |
| 2   | 25.4             | 298.55          | -12.93               |
| 2   | 30.3             | 303.45          | -12.60               |
| 2   | 30.3             | 303.45          | -12.57               |
| 2   | 30.3             | 303.45          | -12.47               |
| 2   | 35.3             | 308.45          | -12.15               |
| 2   | 35.3             | 308.45          | -12.14               |
| 2   | 35.3             | 308.45          | -12.18               |
| 2   | 40.2             | 313.35          | -11.77               |
| 2   | 40.2             | 313.35          | -11.79               |
| 2   | 40.2             | 313.35          | -11.80               |

**Table S2.** Individual measurements of fentanyl hydrochloride vapor pressures, log (P/atm), obtained from the filter collection experiments on two different days.

| <u>Day</u> | <u>Temperature (°C)</u> | <u>Temperature (K)</u> | <u>Fentanyl HCl Log (P/atm)</u> |
|------------|-------------------------|------------------------|---------------------------------|
| 1          | 40.2                    | 313.35                 | -15.23                          |
| 1          | 40.2                    | 313.35                 | -15.22                          |
| 1          | 40.2                    | 313.35                 | -15.29                          |
| 1          | 55.1                    | 328.25                 | -13.83                          |
| 1          | 55.1                    | 328.25                 | -13.76                          |
| 1          | 55.1                    | 328.25                 | -13.78                          |
| 1          | 70.0                    | 343.15                 | -12.40                          |
| 1          | 70.0                    | 343.15                 | -12.36                          |
| 1          | 70.0                    | 343.15                 | -12.32                          |
| 1          | 85.0                    | 358.15                 | -11.15                          |
| 1          | 85.0                    | 358.15                 | -11.14                          |
| 1          | 85.0                    | 358.15                 | -11.09                          |
| 2          | 40.3                    | 313.40                 | -15.25                          |
| 2          | 40.3                    | 313.40                 | -14.94                          |
| 2          | 40.3                    | 313.45                 | -14.96                          |
| 2          | 55.1                    | 328.25                 | -13.62                          |
| 2          | 55.2                    | 328.35                 | -13.54                          |
| 2          | 55.2                    | 328.30                 | -13.53                          |
| 2          | 70.1                    | 343.20                 | -12.36                          |
| 2          | 70.0                    | 343.15                 | -12.35                          |
| 2          | 70.0                    | 343.15                 | -12.31                          |
| 2          | 85.0                    | 358.15                 | -11.29                          |
| 2          | 85.0                    | 358.15                 | -11.32                          |
| 2          | 85.0                    | 358.15                 | -11.27                          |

**Table S3.** Individual measurements of fentanyl free base vapor pressures, log (P/atm), obtained from the wool collection and extraction experiments on two different days.

| Day | Temperature (°C) | Temperature (K) | Fentanyl Log (P/atm) |
|-----|------------------|-----------------|----------------------|
| 1   | 25.4             | 298.55          | -12.51               |
| 1   | 30.3             | 303.45          | -12.02               |
| 1   | 35.3             | 308.45          | -11.71               |
| 1   | 40.2             | 313.35          | -11.77               |
| 1   | 25.4             | 298.55          | -12.51               |
| 1   | 30.3             | 303.45          | -12.26               |
| 1   | 35.3             | 308.45          | -11.94               |
| 1   | 40.2             | 313.35          | -11.54               |
| 2   | 25.3             | 298.40          | -12.84               |
| 2   | 25.4             | 298.55          | -12.82               |
| 2   | 25.4             | 298.55          | -12.85               |
| 2   | 40.3             | 313.45          | -11.94               |
| 2   | 40.3             | 313.45          | -11.65               |
| 2   | 40.3             | 313.45          | -11.74               |
| 2   | 40.3             | 313.45          | -11.63               |
| 2   | 40.3             | 313.45          | -11.68               |
| 2   | 40.3             | 313.45          | -11.54               |

**Table S4.** Individual measurements of fentanyl hydrochloride vapor pressures, log (P/atm), obtained from the wool collection and extraction experiments on two different days.

| Day | Temperature (°C) | Temperature (K) | Fentanyl HCl Log (P/atm) |
|-----|------------------|-----------------|--------------------------|
| 1   | 40.3             | 313.40          | -14.52                   |
| 1   | 55.1             | 328.25          | -13.76                   |
| 1   | 55.1             | 328.25          | -13.71                   |
| 1   | 55.1             | 328.25          | -13.68                   |
| 1   | 55.1             | 328.25          | -13.88                   |
| 1   | 55.1             | 328.25          | -13.74                   |
| 1   | 70.0             | 343.15          | -12.14                   |
| 1   | 70.0             | 343.15          | -12.17                   |
| 1   | 70.0             | 343.15          | -12.10                   |
| 1   | 70.0             | 343.15          | -12.06                   |
| 2   | 55.1             | 328.25          | -12.88                   |
| 2   | 55.1             | 328.25          | -12.87                   |
| 2   | 85.0             | 358.15          | -10.67                   |
| 2   | 85.0             | 358.15          | -10.70                   |
| 2   | 85.0             | 358.15          | -10.80                   |
| 2   | 85.0             | 358.15          | -10.67                   |
| 2   | 100.0            | 373.15          | -9.98                    |
| 2   | 100.0            | 373.15          | -10.02                   |
| 2   | 100.0            | 373.15          | -9.87                    |
| 2   | 100.0            | 373.15          | -10.00                   |

**Table S5.** Results using the wool collection method for fentanyl and fentanyl hydrochloride vapor pressure values, Clausius-Clapeyron equations, and enthalpy of sublimation values.

| Species                | Temperature Range (°C) | Clausius-Clapeyron Equation | Vapor Pressure at 25 °C (atm) | Enthalpy of sublimation (kJ/mol) |
|------------------------|------------------------|-----------------------------|-------------------------------|----------------------------------|
| Fentanyl Free Base     | 25-40                  | $\log P = 8.34 - 6264.3/T$  | $2.1 \times 10^{-13}$         | -120                             |
| Fentanyl Hydrochloride | 40-100                 | $\log P = 16.22 - 9724.9/T$ | $4.0 \times 10^{-17}$         | -186                             |
